# Supplementary material for: Self-Healable Covalently Adaptable Networks Based on Disulfide Exchange
Source: MDPI journal article supplement (doi:10.3390/polym14193953), 2022-09-21
Supplement: s1 [file s1]

## Supporting Information

### Self-healable covalently adaptable networks based on disulfide exchange

Xinru Guo<sup>a</sup>, Feng Liu<sup>a\*</sup>, Meng Lv<sup>a</sup>, Fengbiao Chen<sup>a</sup>, Fei Gao<sup>a\*</sup>, Zhenhua Xiong<sup>a</sup>,  
Xuejiao Chen<sup>a</sup>, Xuelang Gao<sup>b\*</sup>

<sup>a</sup>Jiangxi Engineering Laboratory of Waterborne Coating, School of Chemistry and Chemical Engineering, Jiangxi Science & Technology Normal University, Nanchang, Jiangxi, 330013, P. R. China.

<sup>b</sup>Department of Chemistry, Pohang University of Science and Technology (POSTECH), Pohang, Korea 790-784

E-mail: feng67807@163.com (F. Liu), feigao2016@jxstnu.com.cn (F. Gao);  
xlanggao@postech.ac.kr (XL. Gao)

#### Content

|                                                                                                                             |   |
|-----------------------------------------------------------------------------------------------------------------------------|---|
| 1. Solvent swelling.....                                                                                                    | 2 |
| 2. Calculating the yield of TMPTAA and PETMPA by <sup>1</sup> H NMR.....                                                    | 2 |
| 2.1 Calculating the yield of trimethylolpropane tris(3-mercaptopropionate) acetoacetate (TMPTAA) by <sup>1</sup> H NMR..... | 2 |
| 2.2 Calculating the yield of pentaerythritol tetra(3-mercaptopropionate) acetoacetate (PETMPA) by <sup>1</sup> H NMR.....   | 3 |
| 3. <sup>1</sup> H NMR and <sup>13</sup> C NMR Spectra .....                                                                 | 3 |

## 1. Solvent swelling

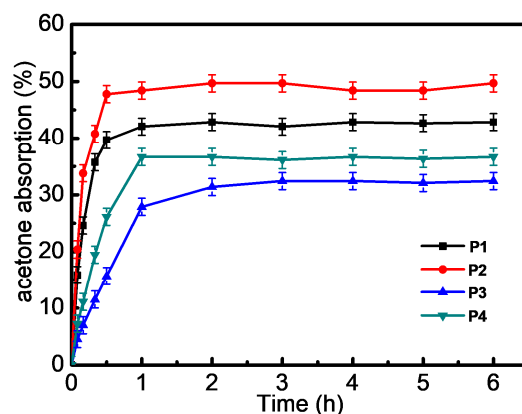

**Figure S1.** Solvent swelling (acetone absorption-time diagram) of P1, P2, P3 and P4.

## 2. Calculating the yield of TMPTAA and PETMPA by $^1\text{H}$ NMR

### 2.1 Calculating the yield of trimethylolpropane tris(3-mercaptopropionate) (TMPTAA) by $^1\text{H}$ NMR

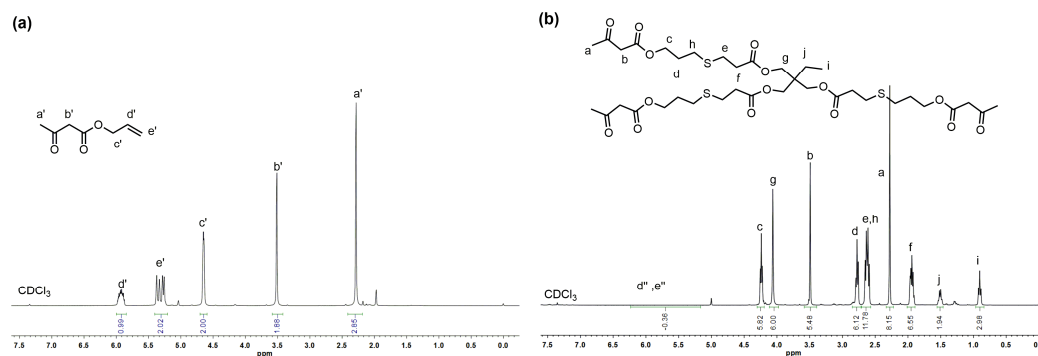

**Figure S2.**  $^1\text{H}$  NMR Spectrum of (a) allyl acetoacetate and (b) trimethylolpropane tris(3-mercaptopropionate) (TMPTAA) (400 MHz,  $\text{CDCl}_3$ , 7.26 ppm)

**Figure S2a** shows that the peak areas of  $c'$  is 4, and the peak area of  $d'$  is 0.99, the peak area of  $e'$  is 2.02; thus, the  $^1\text{H}$  NMR peak areas correspond to the compound structure. Therefore, we can calculate the conversion yield on the basis of the peak area ratios. the yield of trimethylolpropane tris(3-mercaptopropionate) (TMPTAA) can be calculated as:  $W(\%) = [3 \times A(d' + e') - A(d'' + e'')]/[3 \times A(d' + e')] = [3 \times (0.99 + 2.02) - 0.36] / [3 \times (0.99 + 2.02)] = 96\%$ .

## 2.2 Calculating the yield of pentaerythritol tetra(3-mercaptopropionate) (PETMPA) by $^1\text{H}$ NMR

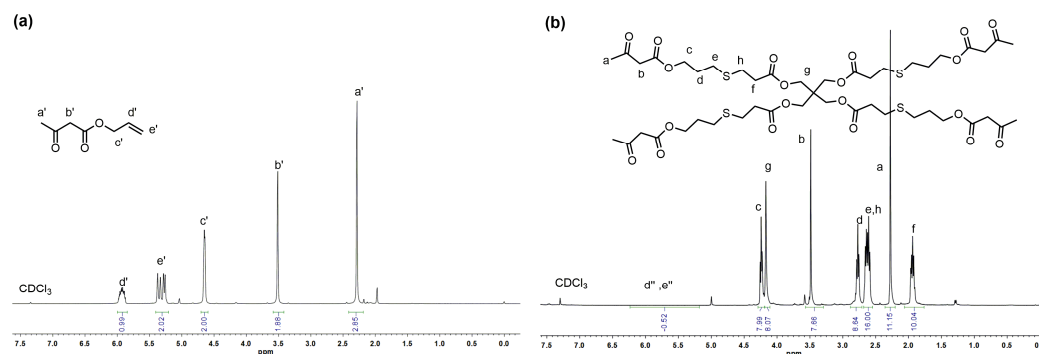

**Figure S3.**  $^1\text{H}$  NMR Spectrum of (a) allyl acetoacetate and (b) pentaerythritol tetra(3-mercaptopropionate) (PETMPA) (400 MHz,  $\text{CDCl}_3$ , 7.26 ppm)

The yield of modified cardanol is calculated using the same method as described in section 2.1: the yield of pentaerythritol tetra(3-mercaptopropionate) acetoacetate (PETMPA) can be calculated as:  $W(\%) = [4 \times A(d' + e') - A(d'' + e'')]/[4 \times A(d' + e')] = [4 \times (0.99 + 2.02) - 0.52]/[4 \times (0.99 + 2.02)] = 93\%$ .

## 3. $^1\text{H}$ NMR and $^{13}\text{C}$ NMR Spectra

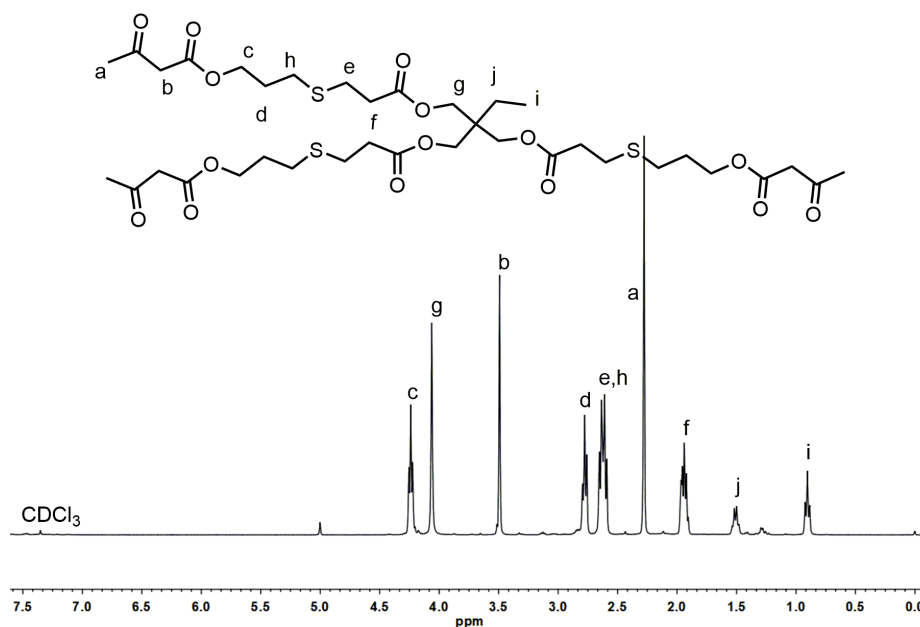

**Figure S4.**  $^1\text{H}$  NMR Spectrum of trimethylolpropane tris(3-mercaptopropionate) (TMPTAA)  
(400 MHz,  $\text{CDCl}_3$ , 7.26 ppm)

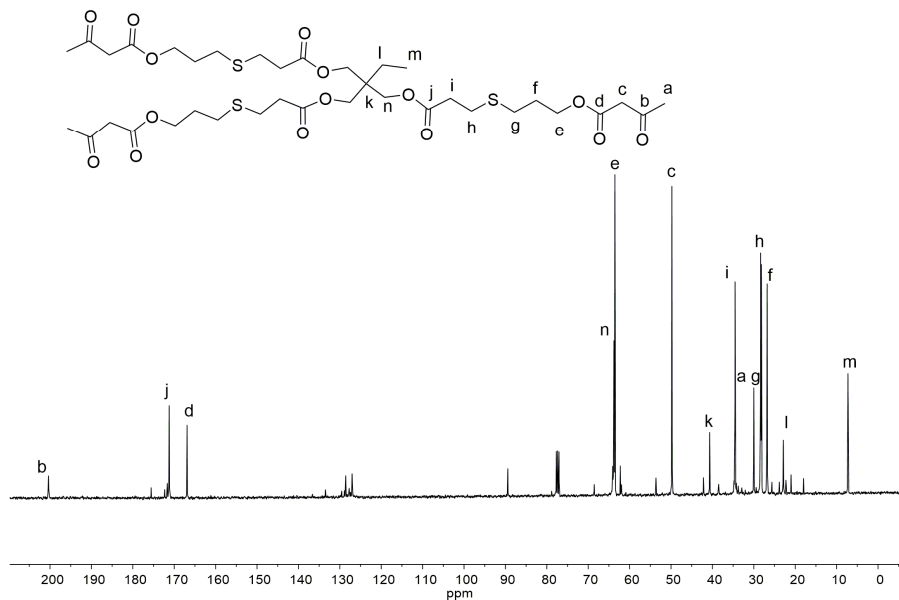

**Figure S5.**  $^{13}\text{C}$  NMR Spectrum of trimethylolpropane tris(3-mercaptopropionate) (TMPTAA)  
(100 MHz,  $\text{CDCl}_3$ , 77 ppm)

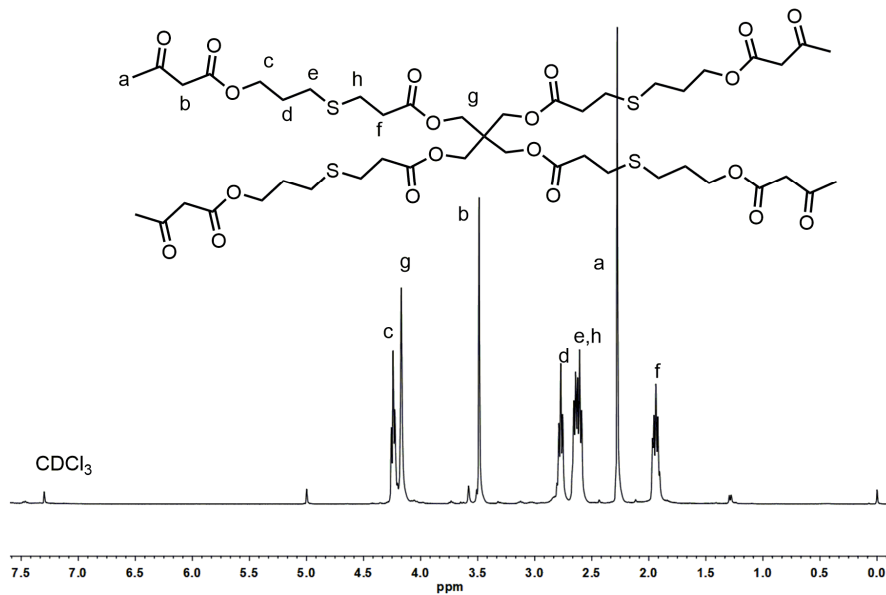

**Figure S6.**  $^1\text{H}$  NMR Spectrum of pentaerythritol tetra(3-mercaptopropionate) (PETMPA)  
(400 MHz,  $\text{CDCl}_3$ , 7.26 ppm)

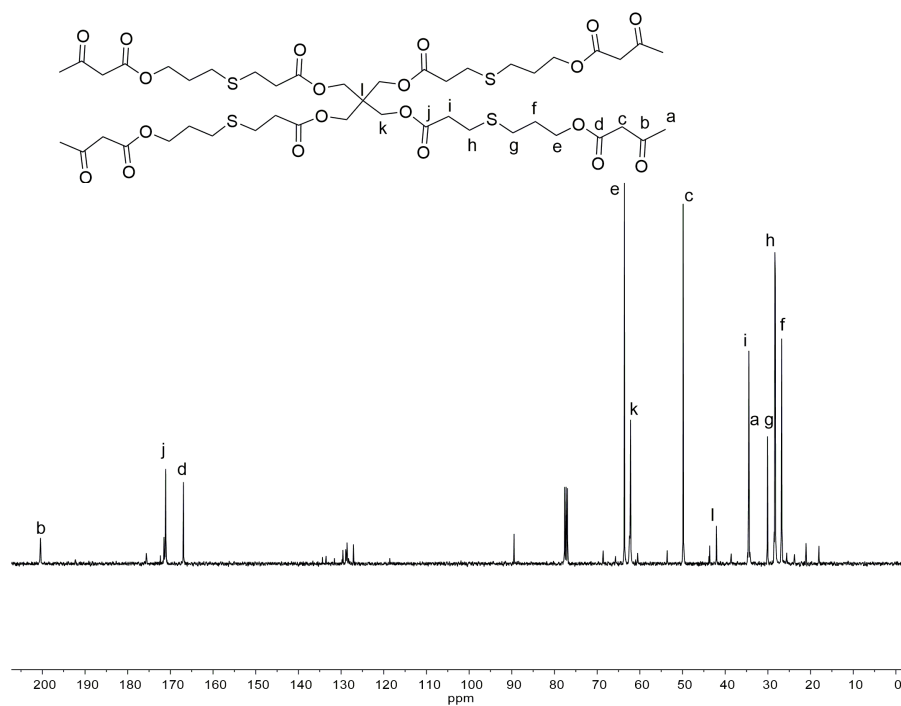

**Figure S7.**  $^{13}\text{C}$  NMR Spectrum of pentaerythritol tetra(3-mercaptopropionate) (PETMPA)  
(100 MHz,  $\text{CDCl}_3$ , 77 ppm)
